# Supplementary material
Source: PubMed Central journal article supplement (PMC5847273)
Supplement: NIHMS889722-supplement-2.pdf [file NIHMS889722-supplement-2.pdf]

## **Supplemental Inventory**

### **Supplemental Figures**

Figure S1, related to Figure 1

Figure S2, related to Figure 2

Figure S3, related to Figure 3 - 5

Figure S4, related to Figure 6

Figure S5, related to Figure 6

### **Supplemental Tables**

Supplemental Table S1, related to Figure 1

Supplemental Table S2, related to Figure 6A

Supplemental Table S3, related to Figure 6A

Supplemental Table S4, related to Figure 6A

Supplemental Table S5, related to Figure 6A

Supplemental Table S6, Primer sequences related to Figure 1 - 6
